# Supplementary material
Source: publisher figshare collection journal article supplement (https://karger.figshare.com/ndownloader/files/14277770)
Supplement: Supplementary file 1 [file 14277770]

**SUPPLEMENTARY TABLE 1.** Secondary Search Terms

| Secondary search terms | Secondary search terms |
| --- | --- |
| 5-ASA | Unmet need |
| Biologics | Treatment failure |
| TNF | Remission |
| Anti-TNF | Response rate |
| Anti-tumour necrosis factor | Adverse events |
| Adalimumab | Treatment discontinuation |
| Infliximab | Quality of life |
| Remicade | Hospitalisation |
| Golimumab | Productivity |
| Vedolizumab | Employment |
| Tofacitinib | Patient preference |
| Humira | Mode of administration |
| Simponi | Route of administration |
| Entyvio | Cost |
| Ustekinumab | Access |
| CT-P13 | Surgery |
| Corticosteroids | Colectomy |
| Steroids | Adherence |
| Thiopurines | Convenience |
| Mesalazine |  |
| Azathioprine |  |
| AZA |  |
| 6-Mercaptopurine |  |
| Mercaptopurine |  |
| 6-MP |  |
| MP |  |
| Immunomodulators |  |
